# Supplementary material for: Persistence of Lineage IV Peste-des-petits ruminants virus within Israel since 1993: An evolutionary perspective
Source: PLoS One. 2017 May 18;12(5):e0177028. doi: 10.1371/journal.pone.0177028 (PMC5436660; doi:10.1371/journal.pone.0177028)
Supplement: S1 Table — (XLSX) [file pone.0177028.s001.xlsx]

## Sheet: Sheet1
Supplementary Table 1 Full-length PPRV Sequences
Accession	Location	Lineage	Year
KM463083	Kenya	III	2011
KJ867543	Uganda	III	2012
KJ867540	Ethiopia	III	1994
KJ867545	UAE	III	1986
KJ867544	Oman	III	1983
KX354359	China	IV	2015
KX033350	India	IV	2016
KR828813	Nigeria	IV	2013
KT633939	China	IV	2015
KP260624	China	IV	2014
KM089830	China	IV	2014
KM089832	China	IV	2014
KP868655	China	IV	2014
KM089831	China	IV	2014
KM091959	China	IV	2013
KM816619	China	IV	2014
KJ867541	Ethiopia	IV	2010
KC594074	Morocco	IV	2008
NC_006383	Turkey	IV	2000
AJ849636.2	Turkey	IV	2000
KR140086	India	IV	1994
JX217850	Tibet	IV	2008
FJ905304	Tibet	IV	2007
JF939201	Tibet	IV	2007
KT270355	India	IV	2014
KR261605	India	IV	2014
EU267273	Cote_d'Ivoire	I	1989
KP789375	Senegal	I	1969
KU236379	Liberia	II	2015
KR781450	Benin	II	1969
EU267274	Nigeria	II	1976
KJ466104	Ghana	II	2010
KM212177	Senegal	II	2013
KR781451	Cote_d'Ivoire	II	2009
KR781449	Benin	II	2011
KR828814	Nigeria	II	2012
